# Supplementary material for: Engagement of the CXCL12–CXCR4 Axis in the Interaction of Endothelial Progenitor Cell and Smooth Muscle Cell to Promote Phenotype Control and Guard Vascular Homeostasis
Source: MDPI journal article supplement (doi:10.3390/ijms23020867), 2022-01-14
Supplement: s1 [file s1]

## Supplementary Figures:

### Supplementary Figure S1

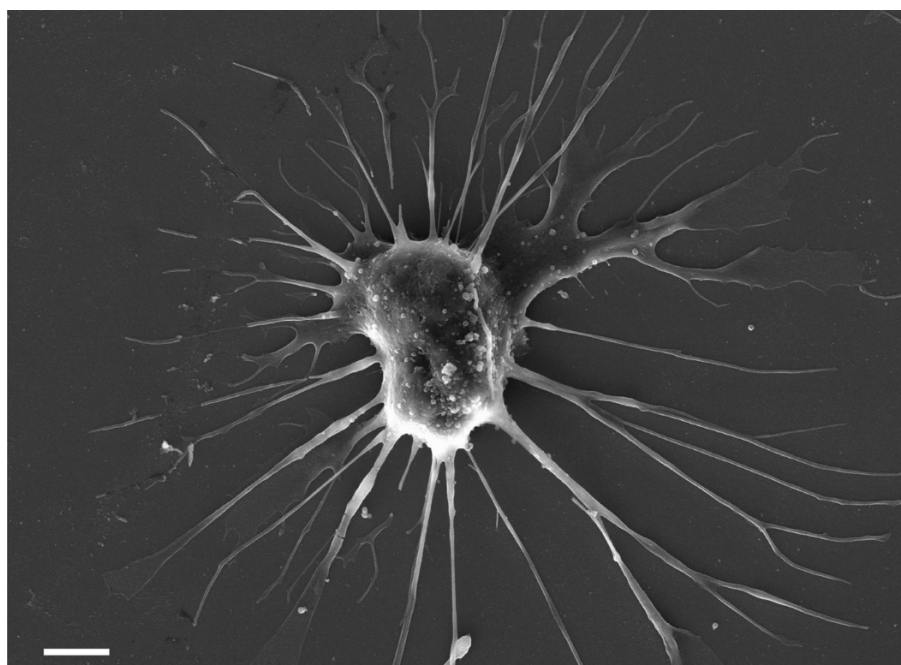

**Supplementary Figure S1.** Scanning electron microscopy (ScEM) for detection of EPC-derived microvesicles. EPCs were plated on glass coverslides and fixed with 3% glutaraldehyde (GA). Following post-fixation with 1% GA, dehydrated samples were processed by critical point drying with CO<sub>2</sub> and sputter-coated with gold. Shown is a representative ScEM image of a EPC grown on glass coverslides. Scale bar= 1000 nm

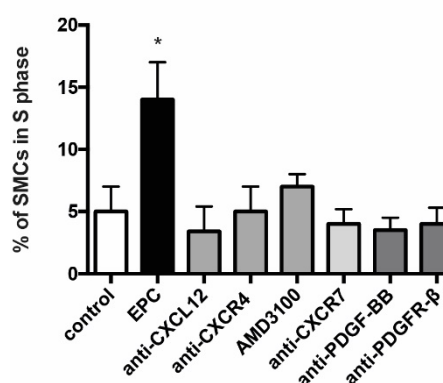

**Supplementary Figure S2.** EPCs induce enhanced SMC proliferation. Flow cytometry-based cell cycle analysis of SMCs treated for 24 h with EPCs, blocking Abs or AMD3100 as indicated. \* P<0.05 vs untreated SMCs (control); n=5.

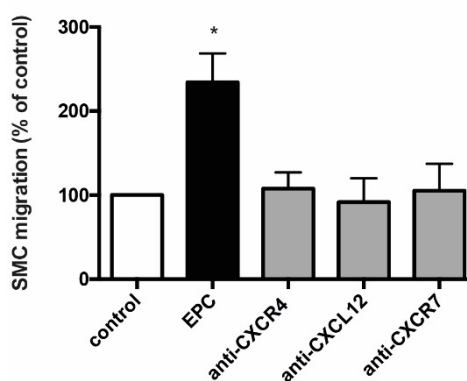

**Supplementary Figure S3.** EPCs stimulate migration of SMCs. Transmigration of SMCs as analyzed in transwell chamber experiments with 8  $\mu$ m pores and expressed as percentage of control. The bottom chamber contained migration medium (DMEM plus 0.5% FBS) supplemented with EPCs or blocking Abs as indicated. \*  $P < 0.05$  vs untreated SMCs (control);  $n = 6$ .

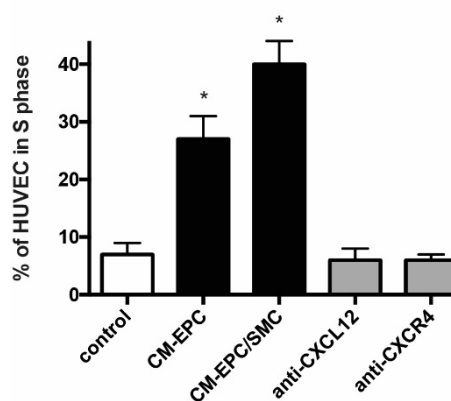

**Supplementary Figure S4.** Proliferation of endothelial cells promoted by EPC/SMC. Flow cytometry-based cell cycle analysis of HUVECs treated for 24 h as indicated. \*  $P < 0.05$  vs untreated HUVECs (control);  $n = 5$ .

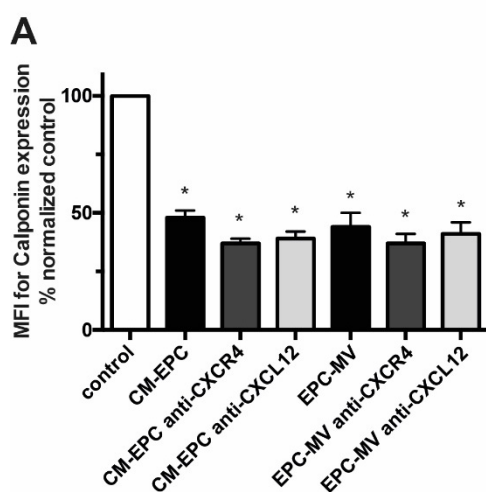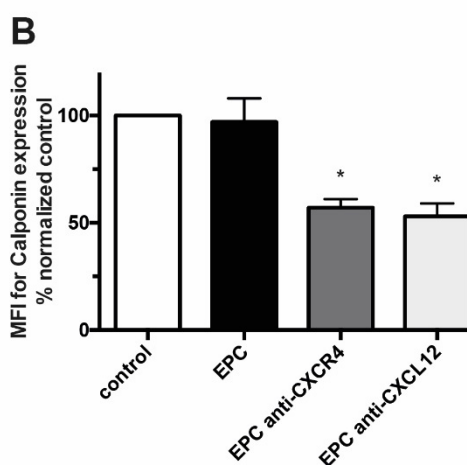

**Supplementary Figure S5.** Analysis of SMC phenotype. SMCs were treated as indicated for 48 h and presence of Calponin was measured using flow cytometry. Data are expressed as mean fluorescence intensity (MFI) in % normalized to untreated SMCs (control). (A) \*  $P < 0.05$  vs untreated SMCs (control), (B) \*  $P < 0.05$  vs SMCs co-cultured with EPCs;  $n = 5$ .

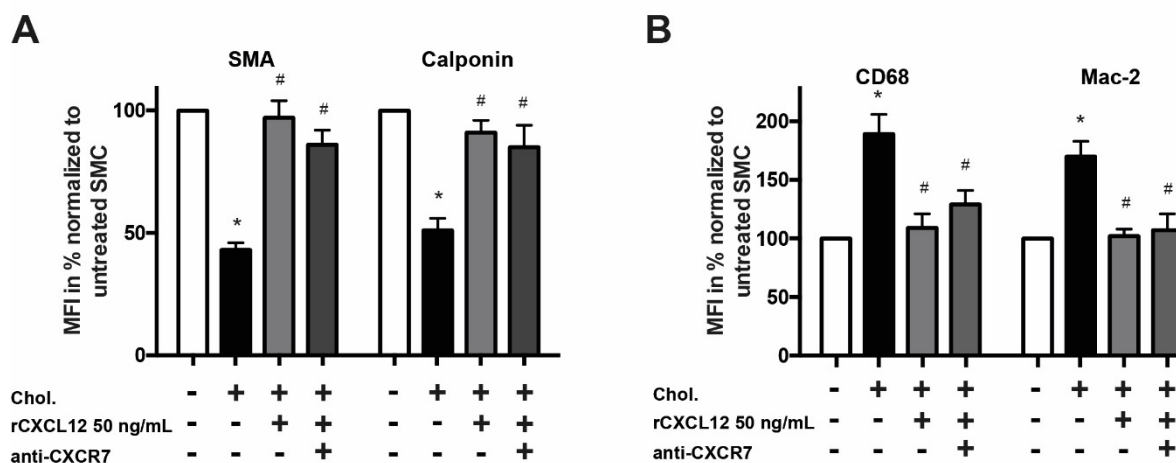

**Supplementary Figure S6.** Role of CXCL12 in protection of cholesterol-induced SMC phenotype switch. SMCs loaded with or without Chol:M $\beta$ CD complexes (Chol) were treated as indicated for 48 hours and presence of stated phenotype markers was determined using flow cytometry. Data are expressed as MFI in % normalized to untreated SMCs (control). (A) \*  $P < 0.05$  vs untreated SMCs (control), (B) #  $P < 0.05$  vs SMCs treated with Chol;  $n = 5$ .

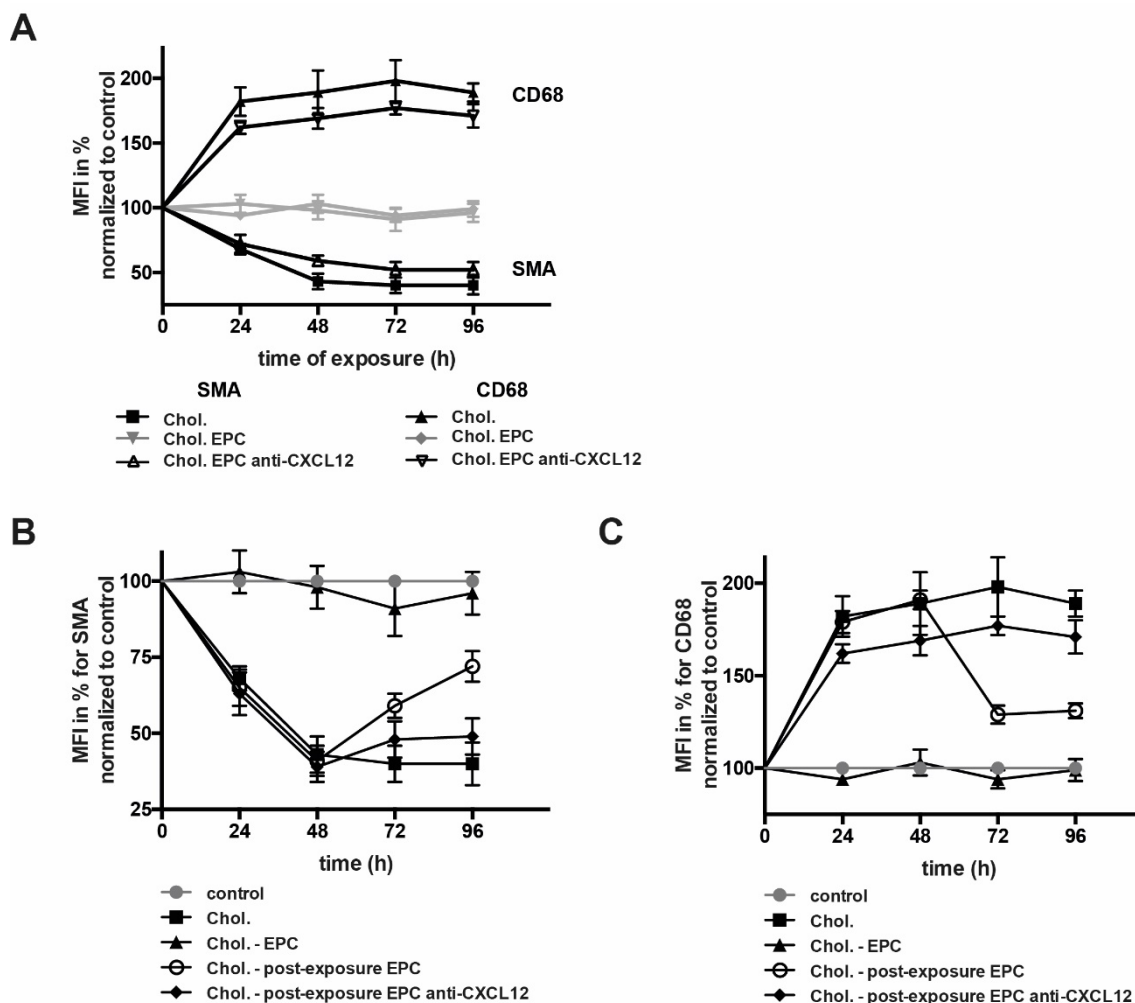

**Supplementary Figure S7.** Engagement of CXCL12 in EPC-mediated reversal of cholesterol-induced SMC phenotype switch. (**A to C**) Time course analysis of SMA and CD68 expression by SMCs treated as indicated for various time periods. (**B, C**) SMCs loaded with Chol:M $\beta$ CD were either continuously co-cultured with EPCs for up to 96 h or were primary treated with Chol:M $\beta$ CD for 48 h and only then subsequently exposed to EPCs in the presence of absence of a blocking CXCL12 Ab for another 48 h (post-exposure); n=4.
